# Supplementary material
Source: PubMed Central journal article supplement (PMC2981471)
Supplement: blood-2010-05-282194_1.pdf [file blood-2010-05-282194_1.pdf]

| Predictor                         | Acute Chest Syndrome |             |                     |             | ICU Admission     |             |                   |             |
|-----------------------------------|----------------------|-------------|---------------------|-------------|-------------------|-------------|-------------------|-------------|
|                                   | Unadjusted           |             | Adjusted            |             | Unadjusted        |             | Adjusted          |             |
|                                   | OR<br>(95% CI)       | P-<br>value | OR<br>(95% CI)      | P-<br>value | OR<br>(95% CI)    | P-<br>value | OR<br>(95% CI)    | P-<br>value |
| Age<br>(per year)                 | 1.1<br>(1.02,1.2)    | 0.02        | 1.09<br>(1.01,1.17) | 0.04        | 1.3<br>(1.1,1.5)  | 0.005       | 1.2<br>(1.03,2.1) | 0.02        |
| H1N1 vs. Seasonal                 | 3.6<br>(1.3, 9.7)    | 0.02        | 3.0<br>(1.1,8.5)    | 0.04        | 6.3 (1.4,29)      | 0.02        | ND                |             |
| Asthma                            | 1.3<br>(0.5, 3.4)    | 0.63        | ND                  |             | 1.3<br>(0.3,6.0)  | 0.70        | ND                |             |
| Hydroxyurea use                   | 1.2<br>(0.5, 2.8)    | 0.64        | ND                  |             | 2.6<br>(1.05,6.5) | 0.04        | ND                |             |
| ACS in last year<br>(per episode) | 2.0<br>(0.93,4.3)    | 0.08        | ND                  |             | 3.3<br>(1.1, 10)  | 0.04        | 13<br>(2.1, 82)   | 0.006       |

OR indicates odds ratio; ICU, intensive care unit; ACS, acute chest syndrome; ND, no data (as the adjusted model for ACS only includes age and pandemic vs. seasonal influenza and the adjusted model for ICU admission only includes age and ACS in the last year).
